# Supplementary material for: Quantitative listening: temporal proportion in recordings of Mozart's piano sonatas
Source: Royal Society of Chemistry journal article supplement (doi:10.1039/c5sc04362j), 2006-06-13
Supplement: c5sc04362j1.pdf [file c5sc04362j1.pdf]

Supporting Information for:

## Electronic Structure of $\text{PbCr}_{(1-x)}\text{S}_x\text{O}_4$ Solid Solution: an Inside Look at Van Gogh Yellow Degradation

Ana B. Muñoz-García,\* Arianna Massaro, and Michele Pavone.

Department of Chemical Sciences, University of Naples Federico II, Via Cintia 21, 80126 Naples, Italy.

### S.1. Structural models for VGY

$\text{PbCr}_{(1-x)}\text{S}_x\text{O}_4$  is a solid solution with  $\text{ABO}_4$  general formula: A-sites are occupied by Pb and B-sites by Cr and S in different ratio.  $\text{PbCrO}_4$  ( $x=0$ ) presents two phases, monoclinic (M) and orthorhombic (O): M is the most abundant and belongs to  $P21/n$  space group; O has been detected in small percentages and belongs to the  $Pnma$  one.<sup>S1</sup> Also  $\text{PbSO}_4$  ( $x=1$ ) belongs to the orthorhombic  $Pnma$  space group. In all these cases, the unit cell contains four formula units ( $\text{A}_4\text{B}_4\text{O}_{16}$ ) for a total of 24 atoms (Figure S.1.0). In M, every  $\text{PbCrO}_4$  atom (Pb, Cr, OI, OII, OIII and OIV) occupies 4e Wyckoff sites.<sup>S2</sup> In O crystals, Pb, Cr/S, OI and OII occupy 4c Wyckoff positions and OIII atoms are in 8d ones.<sup>S3,S4</sup>

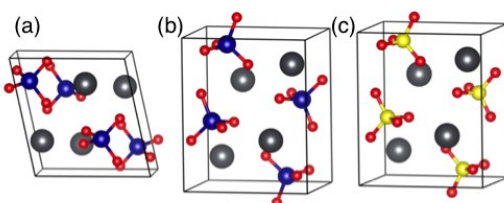

**Figure S.1.0.** Structural models for lead chromate (a) monoclinic and (b) orthorhombic unit cells and for (c) orthorhombic lead sulfate. Spheres represent atoms, color legend: Pb grey, Cr blue, S yellow, and O red.

Besides pure lead chromate and sulphate (see main text for structural details), we have explored the  $\text{PbCr}_{(1-x)}\text{S}_x\text{O}_4$  solid solution with  $x=0.125, 0.25, 0.50, 0.75$  and  $0.875$ . In the following, we describe the corresponding structural models.

- **$\text{PbCr}_{0.875}\text{S}_{0.125}\text{O}_4$ :** The 24-atom  $\text{ABO}_4$  unit cell is insufficient to describe the 7:1 Cr:S ratio. Thereby, a supercell approach is needed in order to get the stoichiometric formula: we substituted 1 Cr atom with 1 S atom in monoclinic 48-atom  $2 \times 1 \times 1$   $\text{PbCrO}_4$  and orthorhombic  $1 \times 2 \times 1$   $\text{PbCrO}_4$  supercells. Figure S.1.1 shows the relaxed structure of the two models.

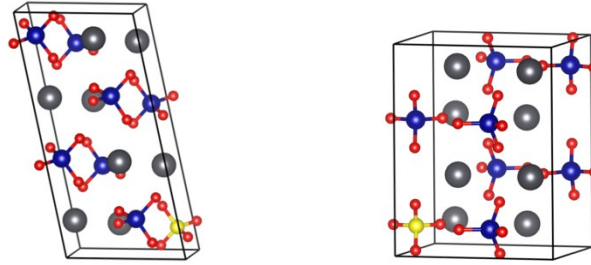

**Figure S.1.1** Structural models of monoclinic (left) and orthorhombic (right)  $\text{PbCr}_{0.875}\text{S}_{0.125}\text{O}_4$

- **$\text{PbCr}_{0.75}\text{S}_{0.25}\text{O}_4$** : it presents a 3:1 Cr:S ratio, which can be modeled by substitution of 1 Cr atom by 1 S atom in the 24-atom  $\text{ABO}_4$  cell (Figure S.1.2)

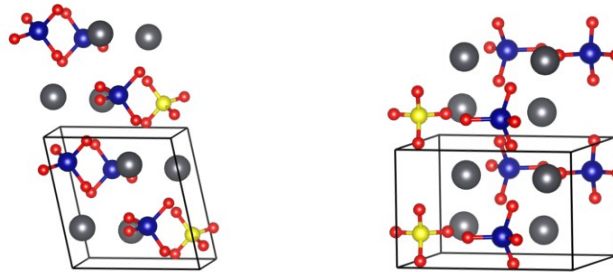

**Figure S.1.2** Structural models of monoclinic (left) and orthorhombic (right)  $\text{PbCr}_{0.75}\text{S}_{0.25}\text{O}_4$

- **$\text{PbCr}_{0.50}\text{S}_{0.50}\text{O}_4$** : we have modeled the 1:1 Cr:S ratio by substituting 2 out of 4 Cr atoms in the 24-atom  $\text{ABO}_4$  unit cell by S. Depending on the relative position of the two substituents in the unit cell, three different configurations arise (Figs S.1.3-5):
  - **Configuration A**, with the largest distance between the 2 S atoms:

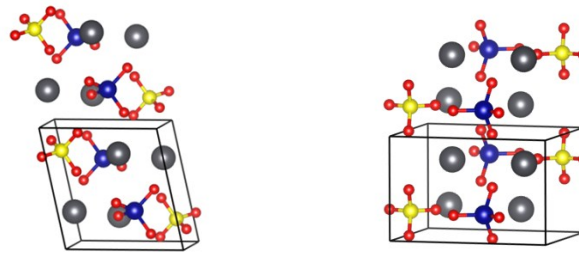

**Figure S.1.3** Structural models of monoclinic (left) and orthorhombic (right)  $\text{PbCr}_{0.50}\text{S}_{0.50}\text{O}_4$  (configuration A)

- **Configuration B**, with the smallest S – S distance:

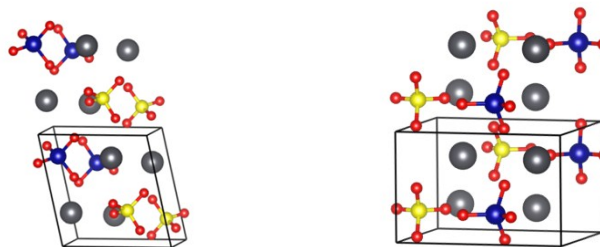

**Figure S.1.4** Structural models of monoclinic (left) and orthorhombic (right)  $\text{PbCr}_{0.50}\text{S}_{0.50}\text{O}_4$  (configuration B)

- **Configuration C**, with an intermediate S – S distance:

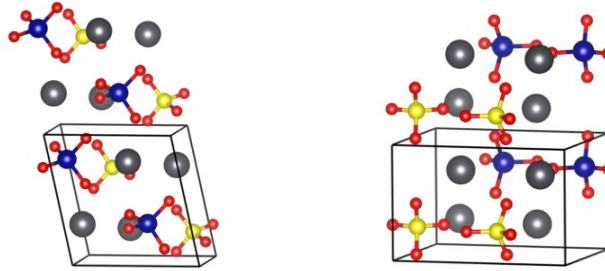

**Figure S.1.5** Structural models of monoclinic (left) and orthorhombic (right)  $\text{PbCr}_{0.50}\text{S}_{0.50}\text{O}_4$  (configuration C)

- **$\text{PbCr}_{0.25}\text{S}_{0.75}\text{O}_4$** : This lattice presents a 1:3 Cr:S ratio, which can be, in principle modeled with the 24-atom  $\text{ABO}_4$  unit. Since this particular solid solution with 1:3 Cr:S ratio is not found experimentally (see main text for details), we have focused on it for analysing the thermodynamic stability of the solid solution and we have considered 48-atom supercells in order to evaluate multiple spatial configurations within the Cr/S sublattice. We substituted 6 Cr atoms with 6 S atoms in  $2 \times 1 \times 1$  monoclinic and  $1 \times 2 \times 1$  orthorhombic supercells. Figure S.1.6 shows random configuration among the 7 possible configurations for each space group.

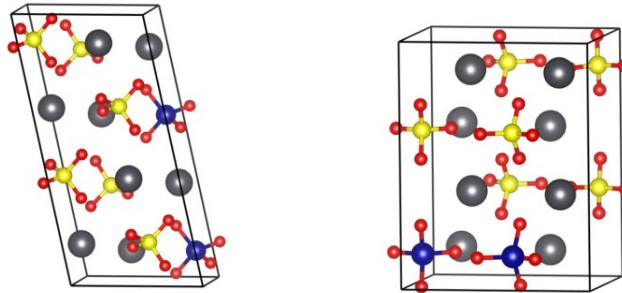

**Figure S.1.6** Structural models of monoclinic (left) and orthorhombic (right)  $\text{PbCr}_{0.25}\text{S}_{0.75}\text{O}_4$

- **$\text{PbCr}_{0.125}\text{S}_{0.875}\text{O}_4$** : as for  $\text{PbCr}_{0.875}\text{S}_{0.125}\text{O}_4$ , we have modeled the 1:7 Cr:S ratio by substitution of 7 Cr atoms with 7 S atoms in 48-atoms supercells (Fig. S.1.7)

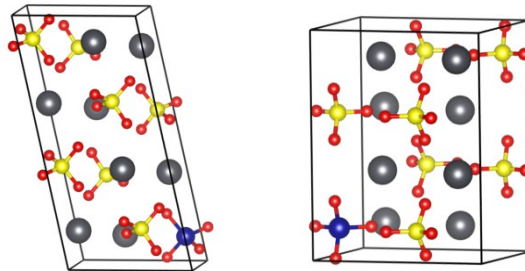

**Figure S.1.8** Structural models of monoclinic (left) and orthorhombic (right)  $\text{PbCr}_{0.125}\text{S}_{0.875}\text{O}_4$

## S.2. Equilibrium Structures: PBE vs PBE-D3 lattice constants and Monoclinic vs Orthorhombic cell volumes

Table S.2.1 gathers the equilibrium lattice constants obtained with PBE and PBE-D3(BJ) methods, in comparison with experimental values.

Table S.2.1 Comparison between experimental lattice parameters and PBE/PBE – D3 (BJ) equilibrium structures. For  $\text{PbCrO}_4$  (monoclinic):  $\beta=102.40^\circ$  (experimental),  $\beta=102.54^\circ$  (theoretical). \*Data without experimental counterpart

| Level of theory  |                                 | Lattice parameters ( $\text{\AA}$ ) |          |          |                     |          |          |
|------------------|---------------------------------|-------------------------------------|----------|----------|---------------------|----------|----------|
|                  |                                 | Monoclinic $P2_1/n$                 |          |          | Orthorhombic $Pnma$ |          |          |
|                  |                                 | <i>a</i>                            | <i>b</i> | <i>c</i> | <i>a</i>            | <i>b</i> | <i>c</i> |
| $\text{PbCrO}_4$ | <i>Experimental</i><br>[Ref. 1] | 7.128                               | 7.437    | 6.801    | 8.667               | 5.548    | 7.118    |
|                  | PBE                             | 7.274                               | 7.605    | 6.912    | 8.712               | 5.617    | 7.165    |
|                  | PBE-D3(BJ)                      | 7.131                               | 7.513    | 6.809    | 8.647               | 5.575    | 7.111    |
| $\text{PbSO}_4$  | <i>Experimental</i><br>[Ref. 2] | -                                   | -        | -        | 8.482               | 5.398    | 6.959    |
|                  | PBE                             | (7.070)                             | 7.285    | 6.755)*  | 8.528               | 5.530    | 7.057    |
|                  | PBE-D3(BJ)                      | (7.054)                             | 7.269    | 6.740)*  | 8.489               | 5.419    | 7.047    |

Ref 1. Monico L., Janssens K., Hendriks E., Brunetti B.G., Miliani C., *J. Raman. Spectrosc.*, **45**, 1034-45, (2014)

Ref 2. Miyake M., Minato I., Morikawa H., Iwai S., *Am. Mineral.*, **63**, 506-510, (1978)

Table S.2.2 lists the equilibrium volumes of monoclinic and orthorhombic at PBE-D3(BJ) level of theory.

Table S.2.2 Calculated equilibrium volumes of monoclinic and orthorhombic VGY solid solution at PBE-D3 level of theory. In parenthesis, forms that are not detected experimentally.

| Structure                                       | Equilibrium Volume ( $\text{\AA}^3$ ) |                     |
|-------------------------------------------------|---------------------------------------|---------------------|
|                                                 | Monoclinic $P2_1/n$                   | Orthorhombic $Pnma$ |
| $\text{PbCrO}_4$                                | 356.12                                | 342.85              |
| $\text{PbCr}_{0.875}\text{S}_{0.125}\text{O}_4$ | 354.69                                | (353.98)            |
| $\text{PbCr}_{0.75}\text{S}_{0.25}\text{O}_4$   | 352.62                                | (351.92)            |
| $\text{PbCr}_{0.50}\text{S}_{0.50}\text{O}_4$   | 347.90                                | (344.95)            |
| $\text{PbCr}_{0.125}\text{S}_{0.875}\text{O}_4$ | (352.53)                              | 333.96              |
| $\text{PbSO}_4$                                 | (337.51)                              | 324.17              |

## S.3. Exploring segregation in VGY

We have hypothesized a possible tendency towards phase separation between lead chromate and lead sulphate already in the bulk state as a first cause of the degradation.

Sulphur segregation has been simulated by optimization of the three different configurations of  $\text{PbCr}_{0.50}\text{S}_{0.50}\text{O}_4$  solid solution described in S.1. Among these structures, it is possible to distinguish between a more segregated (smallest distance between sulphur atoms, B), a more homogeneous structure (largest S–S distance, structure A) and an intermediate situation (configuration C). Fig. S.3 shows the energy differences with respect to the most stable configuration after relaxation.

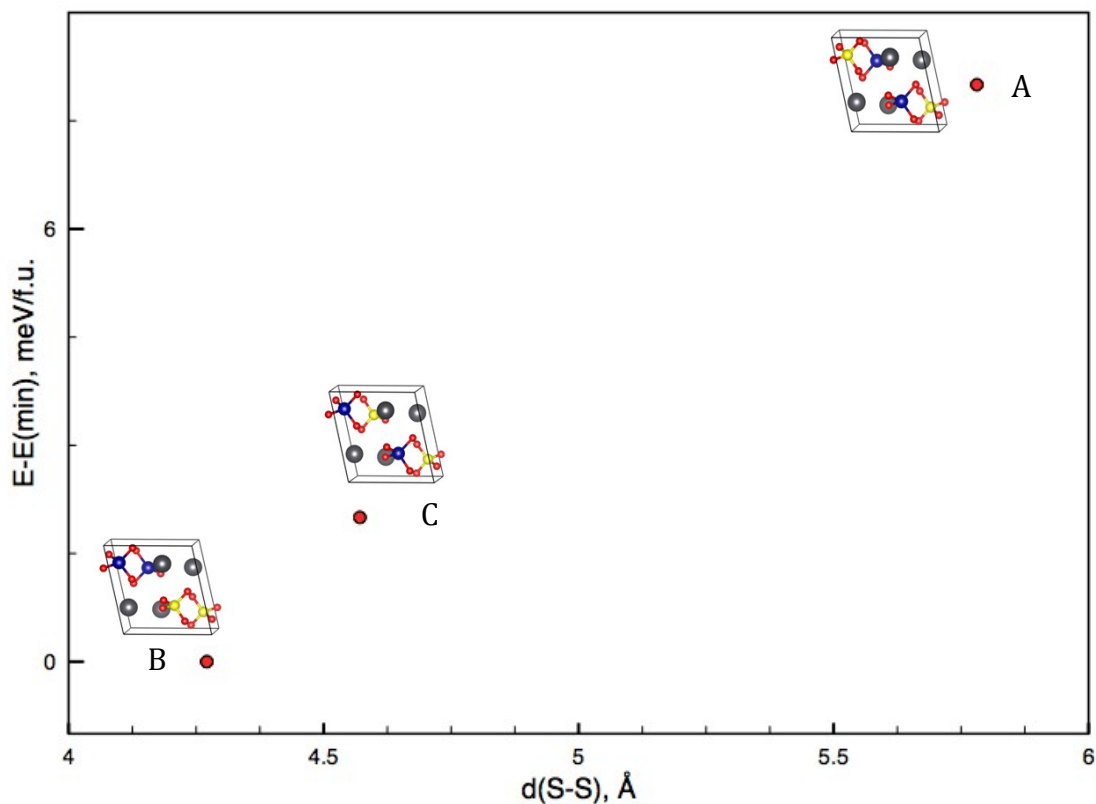

**Figure S.3** Difference in energy ( $E - E_{(\text{min})}$ ) of each  $\text{PbCr}_{0.50}\text{S}_{0.50}\text{O}_4$  configuration (see S.1. for details) compared with the minimum-energy configuration as a function of S – S distance.

From our calculations, we can state that the “segregated” configuration B is the most stable, while the “homogeneous” solution A is the less stable. One reason behind this tendency of atoms at the B site of the  $\text{ABO}_4$  structure to aggregate can be found in the significant difference between Cr-O and S-O distances ( $\sim 1.66$  and  $1.49$  Å, respectively, in both the parent solids and in VGY with  $x = 0.5$ ), that brings an important size mismatch among the  $\text{BO}_4$  moieties. The overall stress on the bulk structure is minimized when the dissimilar moieties are close in the cell.

#### S.4. Bader (AIM) Charge analysis of $\text{PbCrO}_4$

Table S.4 gathers the calculated Bader charges of Pb, Cr and O species in monoclinic  $\text{PbCrO}_4$ , which give a qualitative indication of their oxidation state in this solid. From our calculations, Pb presents a oxidation state close to the +2 formal oxidation state for A-site

in  $ABO_4$  compounds. Cr and O oxidation states, however, are very far from the formal +6 and -2 expected, which is a clear indication of the high degree of covalency of Cr-O bonds. Thus,  $PbCrO_4$  can be regarded as  $(CrO_4)^{2-}$  highly moieties electrostatically attracted to  $Pb^{2+}$  cations. For this reason, it is reasonable to describe Cr, not as Cr(IV) with  $d^0$  configuration, but with some occupation at the  $d$  orbitals, which hybridize with oxygen  $p$  orbitals.

Table S.4 Calculated Bader charges of Pb, Cr and O in monoclinic  $PbCrO_4$  at PBE and PBE+U levels of theory

| Specie | Bader Charges |        |                               |
|--------|---------------|--------|-------------------------------|
|        | Formal        | PBE    | PBE+U<br>( $U-J_{Cr}=3.2$ eV) |
| Pb     | +2            | +1.544 | +1.542                        |
| Cr     | +6            | +1.820 | +1.828                        |
| O      | -2            | -0.816 | -0.818                        |

### S.5. PBE(+U) bandgaps in VGY

Table S.5 lists the calculated eigenvalue gaps of the VGY solid solution at the PBE and PBE+U levels of theory. The PBE+U values have been used to estimate the  $G_0W_0$ -related bandgaps according to eq. 3 of the main text.

Table S.5 Band gaps of  $PbCr_{(1-x)}S_xO_4$  equilibrium structures at PBE and PBE+U levels of theory

| Structure                  | Band gap (eV)                      |       |                          |       |
|----------------------------|------------------------------------|-------|--------------------------|-------|
|                            | <i>Monoclinic P2<sub>1</sub>/n</i> |       | <i>Orthorhombic Pnma</i> |       |
|                            | PBE                                | PBE+U | PBE                      | PBE+U |
| $PbCrO_4$                  | 1.68                               | 1.89  | 1.95                     | 2.16  |
| $PbCr_{0.875}S_{0.125}O_4$ | 1.73                               | 1.94  | 1.98                     | 2.19  |
| $PbCr_{0.75}S_{0.25}O_4$   | 1.85                               | 2.05  | 2.05                     | 2.26  |
| $PbCr_{0.50}S_{0.50}O_4$   | A                                  | 1.92  | 2.12                     | 2.06  |
|                            | B                                  | 1.92  | 2.12                     | 2.19  |
|                            | C                                  | 1.94  | 2.13                     | 2.18  |
| $PbCr_{0.125}S_{0.875}O_4$ | 2.04                               | 2.24  | 2.28                     | 2.47  |
| $PbSO_4$                   | 4.36                               | -     | 4.03                     | -     |

### S.6. PDOS of VGY solid solution

Figs. S.6.1, S.6.2 and S.6.3 display the computed projected density of states of  $PbCr_{0.875}S_{0.125}O_4$ ,  $PbCr_{0.75}S_{0.25}O_4$  and  $PbCr_{0.5}S_{0.5}O_4$  (configuration B, the most stable – see S.3 for details), respectively. Together with that of  $PbCr_{0.875}S_{0.125}O_4$  (see Fig. 8 in the main

text), they show that the electronic structure of VGY solid solution for all  $x$  retains the band edges features of  $\text{PbCrO}_4$  (Fig. 6 in the main text), while S sites are very intern and do not participate in the band edges character.

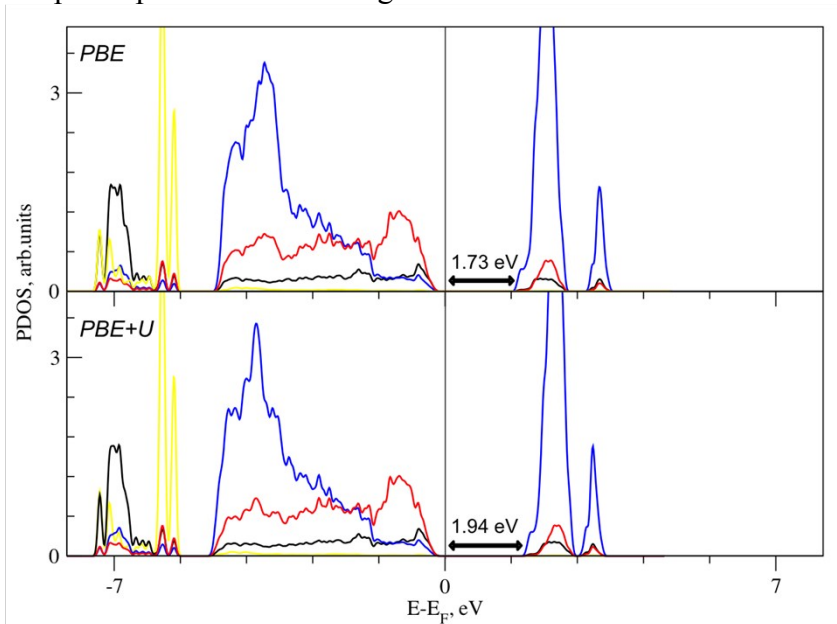

**Figure S.6.1** Projected density of states (PDOS) of monoclinic  $\text{PbCr}_{0.875}\text{S}_{0.125}\text{O}_4$  equilibrium structure at PBE and PBE+U levels of theory. Color legend: Pb  $d$  states are in black, Cr  $d$  states in blue, and O  $p$  states in red. The Fermi energy ( $E_F$ ) is set to zero. Eigenvalue gaps are indicated (in eV).

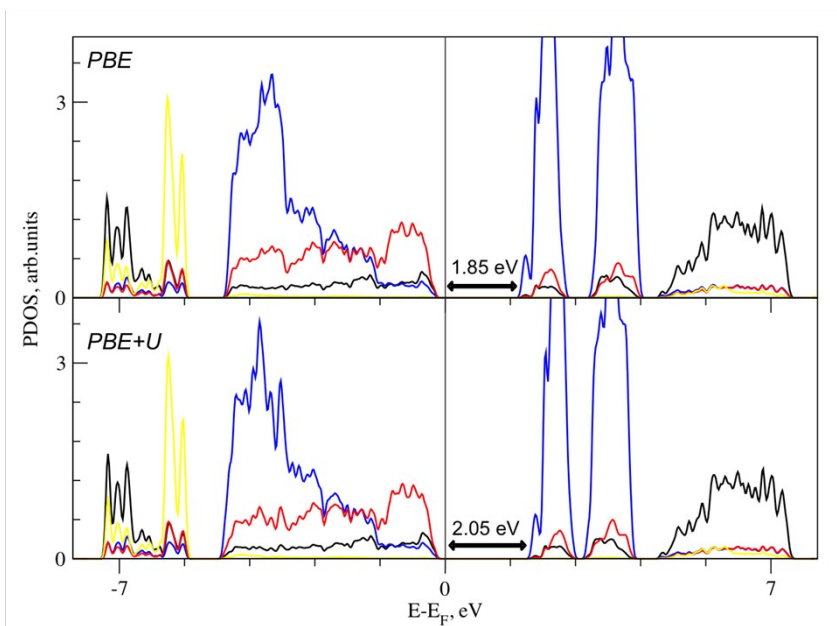

**Figure S.6.2** Projected density of states (PDOS) of monoclinic  $\text{PbCr}_{0.75}\text{S}_{0.25}\text{O}_4$  equilibrium structure at PBE and PBE+U levels of theory. Color legend: Pb  $d$  states are in black, Cr  $d$  states in blue, and O  $p$  states in red. The Fermi energy ( $E_F$ ) is set to zero. Eigenvalue gaps are indicated (in eV).



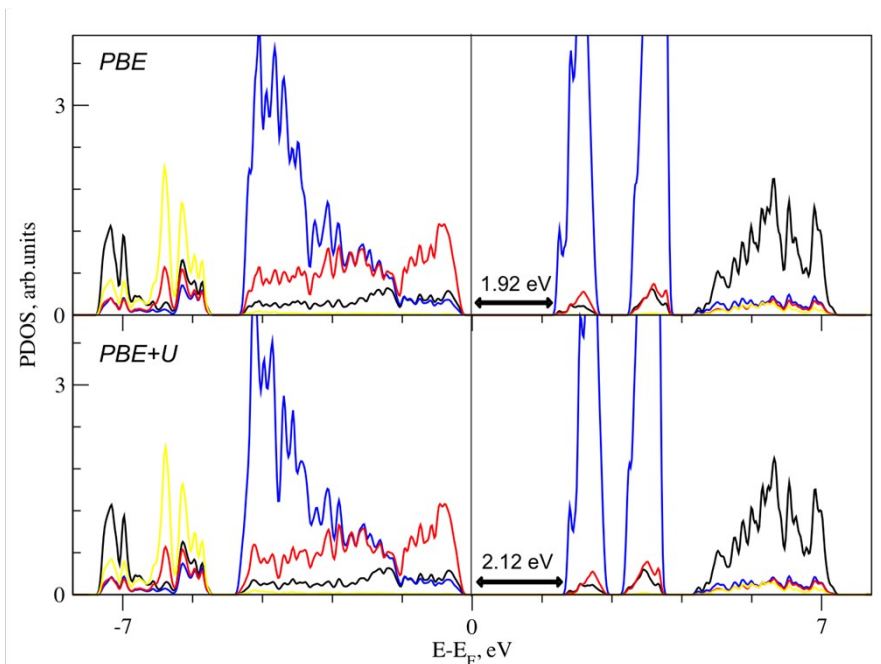

**Figure S.6.3** Projected density of states (PDOS) of monoclinic  $\text{PbCr}_{0.5}\text{S}_{0.5}\text{O}_4$  equilibrium structure (configuration B) at PBE and PBE+U levels of theory. Color legend: Pb  $d$  states are in black, Cr  $d$  states in blue, and O  $p$  states in red. The Fermi energy ( $E_F$ ) is set to zero. Eigenvalue gaps are indicated (in eV).

## REFERENCES

- S1. L. Monico, K. Janssens, E. Hendriks, B.G. Brunetti, C. Miliani, Raman study of different crystalline forms of  $\text{PbCrO}_4$  and  $\text{PbCr}_{1-x}\text{S}_x\text{O}_4$  solid solutions for the noninvasive identification of chrome yellows in paintings: a focus on works by Vincent van Gogh. *Journal of Raman Spectroscopy* **2014**, 45, 1034-1045.
- S2. E. Bandiello, D. Errandonea, D. Martinez-Garcia, D. Santamaria-Perez, F. J. Manjón, Effects of high-pressure on the structural, vibrational, and electronic properties of monazite-type  $\text{PbCrO}_4$ , *Phys. Rev. B* **2012**, 85, 024108.
- S3. G. Collotti, L. Conti, M. Zocchi, The structure of the orthorhombic modification of lead chromate  $\text{PbCrO}_4$ . *Acta Crystallographica* **1959**, 12, 416-416.
- S4. M. Miyake, I. M., H. Morikawa and S. Iwai, Crystal structures and sulphate force constants of barite, celestite, and anglesite. *American Mineralogist* **1978**, 63, 506-510.
